# Supplementary material for: Compositional optimization of a 2D–3D heterojunction interface for 22.6% efficient and stable planar perovskite solar cells
Source: Royal Society of Chemistry journal article supplement (doi:10.1039/d0ta09209f), 2020-01-01
Supplement: d0ta09209f1.pdf [file d0ta09209f1.pdf]

## Supplementary Information

### **Compositional Optimization of 2D-3D Heterojunction Interface for 22.6% Efficient and Stable Planar Perovskite Solar Cells**

Maosheng He<sup>a</sup>, Jianghu Liang<sup>a</sup>, Zhanfei Zhang<sup>a</sup>, Yuankun Qiu<sup>a</sup>, Zihao Deng<sup>a</sup>, Heng Xu<sup>a</sup>, Jianli Wang<sup>a</sup>, Yajuan Yang<sup>a</sup>, Zhenhua Chen<sup>b</sup>, and Chun-Chao Chen<sup>a\*</sup>

<sup>a</sup>School of Materials Science and Engineering, Shanghai Jiao Tong University, Shanghai 200240, P. R. China

<sup>b</sup>Shanghai Synchrotron Radiation Facility (SSRF), Shanghai Advanced Research Institute, Chinese Academy of Sciences, Shanghai 201800, China

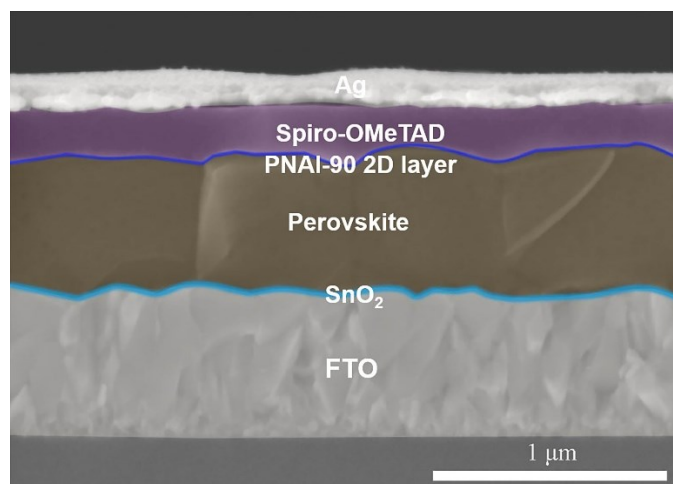

Figure S1 False colored cross-sectional SEM image of PNAI-90 treated perovskite device.

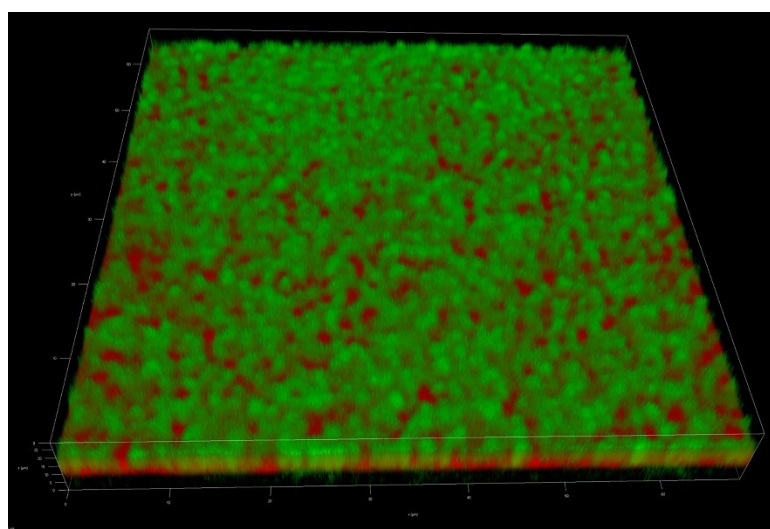

Figure S2 3D CLSM image of PNAI-90 treated perovskite film

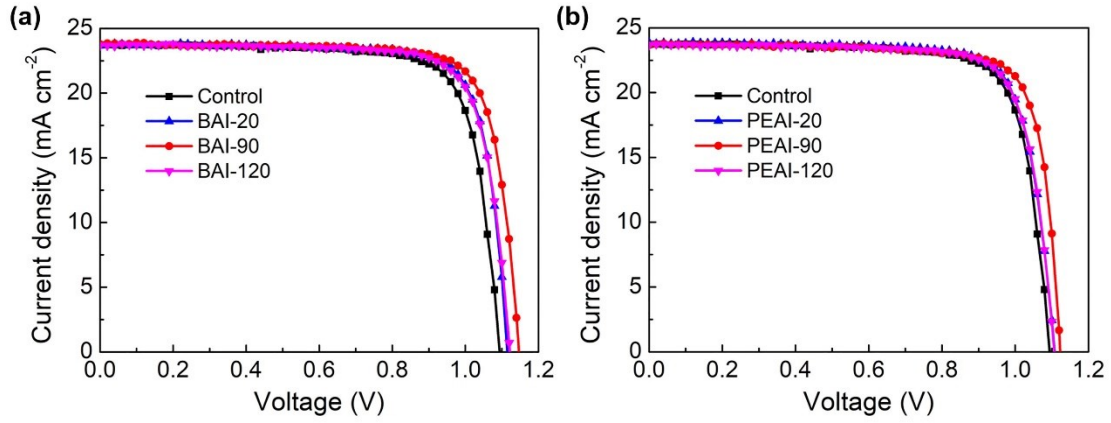

Figure S3 J-V curves of PSCs under different interfacial treatments by BAI (a) and PEAI (b).

Table S1 Photovoltaic characteristics of the best devices under different interfacial treatments

| Devices  | PCE(%) | $V_{oc}$ (V) | $J_{sc}$ (mA cm <sup>-2</sup> ) | FF    |
|----------|--------|--------------|---------------------------------|-------|
| Control  | 20.26  | 1.08         | 23.74                           | 78.99 |
| BAI-20   | 21.17  | 1.10         | 23.82                           | 80.80 |
| BAI-90   | 21.69  | 1.14         | 23.89                           | 79.63 |
| BAI-120  | 20.87  | 1.12         | 23.80                           | 78.30 |
| PEAI-20  | 20.77  | 1.10         | 23.88                           | 79.06 |
| PEAI-90  | 21.30  | 1.12         | 23.78                           | 79.97 |
| PEAI-120 | 20.65  | 1.10         | 23.74                           | 79.09 |

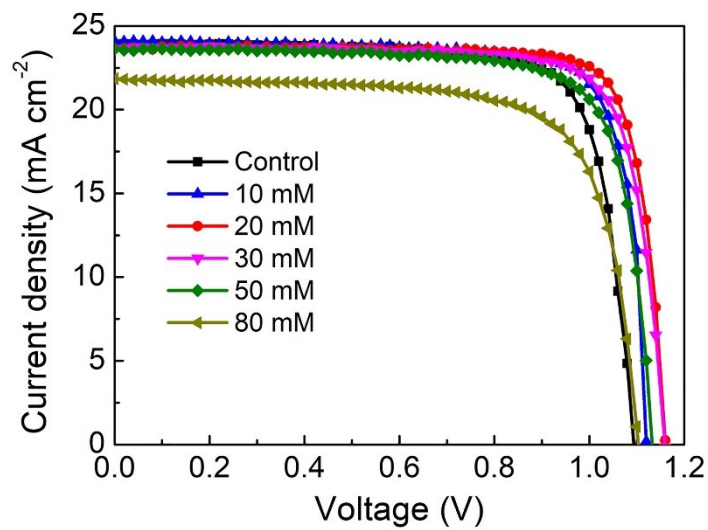

Figure S4 J-V curves of PSCs treated by PNAI-90 at different concentrations.

Table S2 Photovoltaic characteristics of PSCs treated by PNAI-90 at different concentrations.

| Devices | PCE(%) | V <sub>oc</sub> (V) | J <sub>sc</sub> (mA/cm <sup>2</sup> ) | FF    |
|---------|--------|---------------------|---------------------------------------|-------|
| Control | 20.26  | 1.08                | 23.74                                 | 78.99 |
| 10 mM   | 21.81  | 1.12                | 24.09                                 | 80.83 |
| 20 mM   | 22.62  | 1.16                | 23.82                                 | 81.87 |
| 30 mM   | 21.88  | 1.14                | 23.79                                 | 80.66 |
| 50 mM   | 20.78  | 1.12                | 23.64                                 | 78.48 |
| 80 mM   | 17.69  | 1.10                | 21.85                                 | 73.57 |

Table S3 Photovoltaic characteristics of the devices under different scan directions

| Devices | PCE (%) | V <sub>oc</sub> (V) | J <sub>sc</sub> (mA cm <sup>-2</sup> ) | FF (%) | Hysteresis index |
|---------|---------|---------------------|----------------------------------------|--------|------------------|
| Control | 20.26   | 1.08                | 23.74                                  | 78.99  | 6.3%             |
|         | 18.98   | 1.06                | 23.68                                  | 75.63  |                  |
| PNAI-90 | 22.62   | 1.16                | 23.82                                  | 81.87  | 2.4%             |
|         | 22.07   | 1.16                | 23.75                                  | 80.10  |                  |

Table S4 Fitting parameters for the time resolved PL curves of perovskite films.

| Samples  | T <sub>avg</sub> (ns) | τ <sub>1</sub> (ns) | τ <sub>2</sub> (ns) | τ <sub>3</sub> (ns) | A1 (%) | A2 (%) | A3 (%) |
|----------|-----------------------|---------------------|---------------------|---------------------|--------|--------|--------|
| Control  | 509.64                | 7.23                | 78.37               | 553.23              | 34.24  | 25.24  | 40.52  |
| PNAI-20  | 634.42                | 15.72               | 87.27               | 1022.8<br>0         | 67.24  | 27.77  | 4.98   |
| PNAI-90  | 1008.3<br>9           | 7.04                | 59.29               | 1209.5<br>6         | 69.47  | 23.16  | 7.37   |
| PNAI-120 | 402.99                | 16.28               | 87.47               | 738.24              | 62.99  | 31.86  | 5.15   |

$$F(t)=A_1\exp(-t/\tau_1) + A_2\exp(-t/\tau_2) + A_3\exp(-t/\tau_3) + \gamma_0$$

where τ<sub>1</sub>, τ<sub>2</sub>, and τ<sub>3</sub> are fast decay time, intermediate decay time, and slow decay time, A<sub>1</sub>, A<sub>2</sub>, and A<sub>3</sub> are the coefficient, respectively.

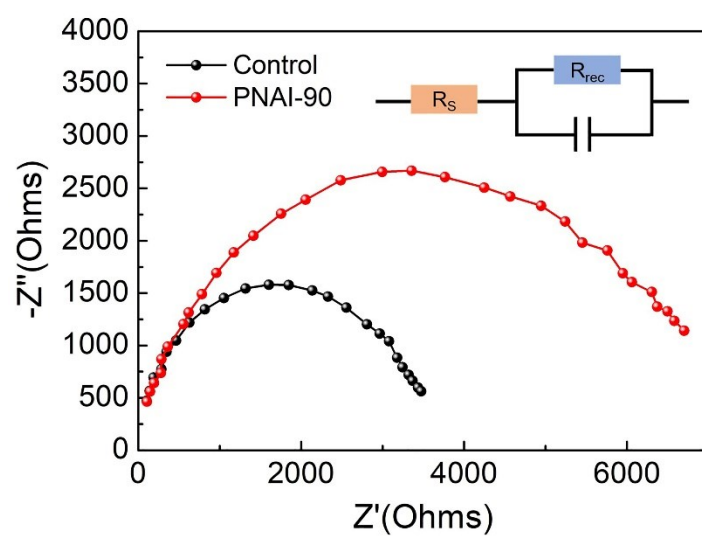

Figure S5 Nyquist plots of control and PNAI-90 treated perovskite solar cells measured in the dark.

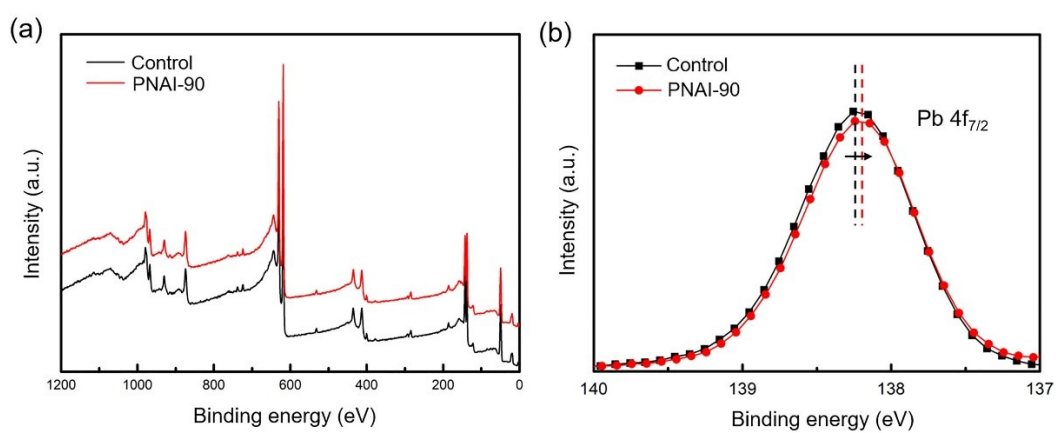

Figure S6 (a) survey scan of XPS spectra of Control and PNAI-90 treated perovskite films. (b) the core level of Pb  $4f_{7/2}$  obtained from the narrow scan.

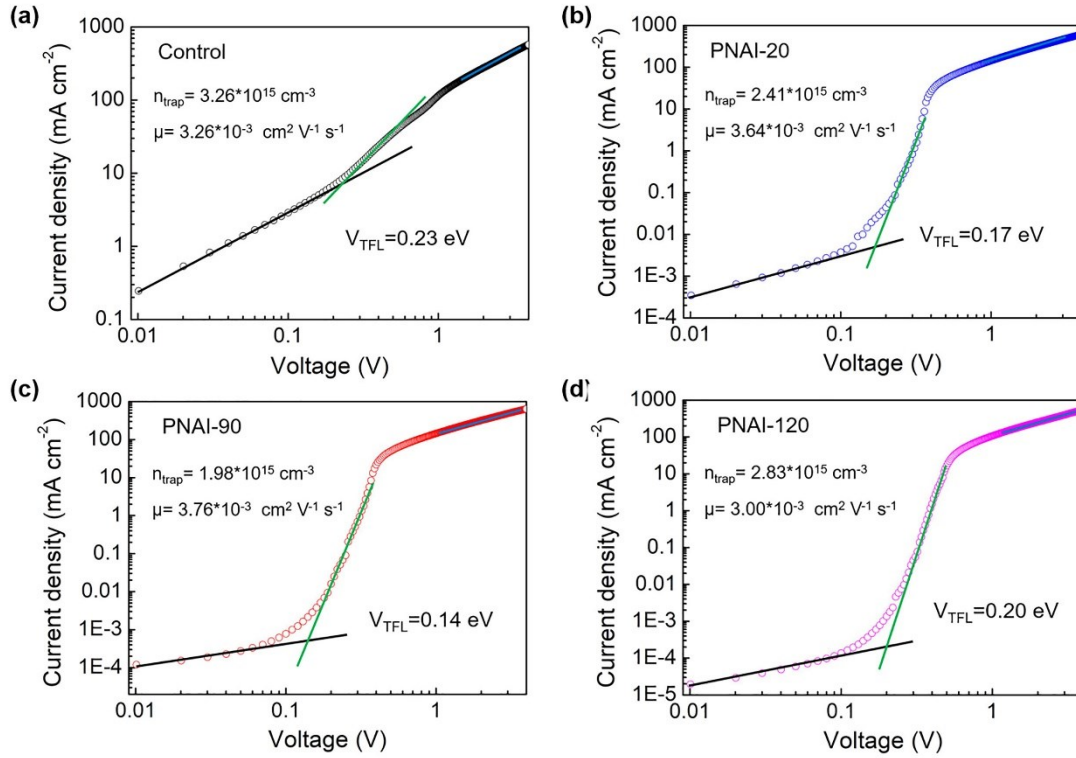

Figure S7 Space charge-limited current (SCLC) of electron-only devices with structure of FTO/SnO<sub>2</sub>/Perovskite/with or without interfacial layers/PCBM/Ag under dark conditions.

The architectures of electron-only devices are FTO/SnO<sub>2</sub>/perovskite/with or without interfacial layer/PCBM/Ag, and their dark trap-filled limit voltage ( $V_{TFL}$ ) values from the I-V curves are 0.23 eV, 0.17 eV, 0.14 eV, 0.20 eV, respectively. The trap density ( $n_{trap}$ ) can be calculated according to the following formula<sup>1</sup>:

$$n_{trap} = \frac{2\varepsilon_0\varepsilon_r V_{TFL}}{eL^2}$$

Where  $\varepsilon_0 = 8.85 \times 10^{-12} \text{ F m}^{-1}$  and  $\varepsilon_r = 46.9$  are the vacuum permittivity and the relative dielectric constants of FAPbI<sub>3</sub>, respectively<sup>2</sup>;  $e$  is the elementary charge of the electron;  $L \sim 605 \text{ nm}$  is the thickness of the perovskite film measured by the cross-section SEM image.

Furthermore, the electron mobility ( $\mu$ ) was derived using the Mott–Gurney law:

$$\mu = \frac{8J_D L^3}{9\varepsilon_0\varepsilon_r V^2}$$

where  $J_D$  is the current density and  $V$  is the applied voltage.

Table S5 Fitting parameters for the time resolved PL curves of perovskite/HTL films.

| Samples  | $\tau_{\text{avg}}$ (ns) | $\tau_1$ (ns) | $\tau_2$ (ns) | A1 (%) | A2 (%) |
|----------|--------------------------|---------------|---------------|--------|--------|
| Control  | 9.29                     | 1.29          | 10.70         | 59.42  | 40.58  |
| PNAI-20  | 8.91                     | 1.04          | 10.32         | 64.03  | 35.97  |
| PNAI-90  | 6.24                     | 1.18          | 8.11          | 71.84  | 28.16  |
| PNAI-120 | 7.30                     | 1.41          | 10.12         | 77.42  | 22.58  |

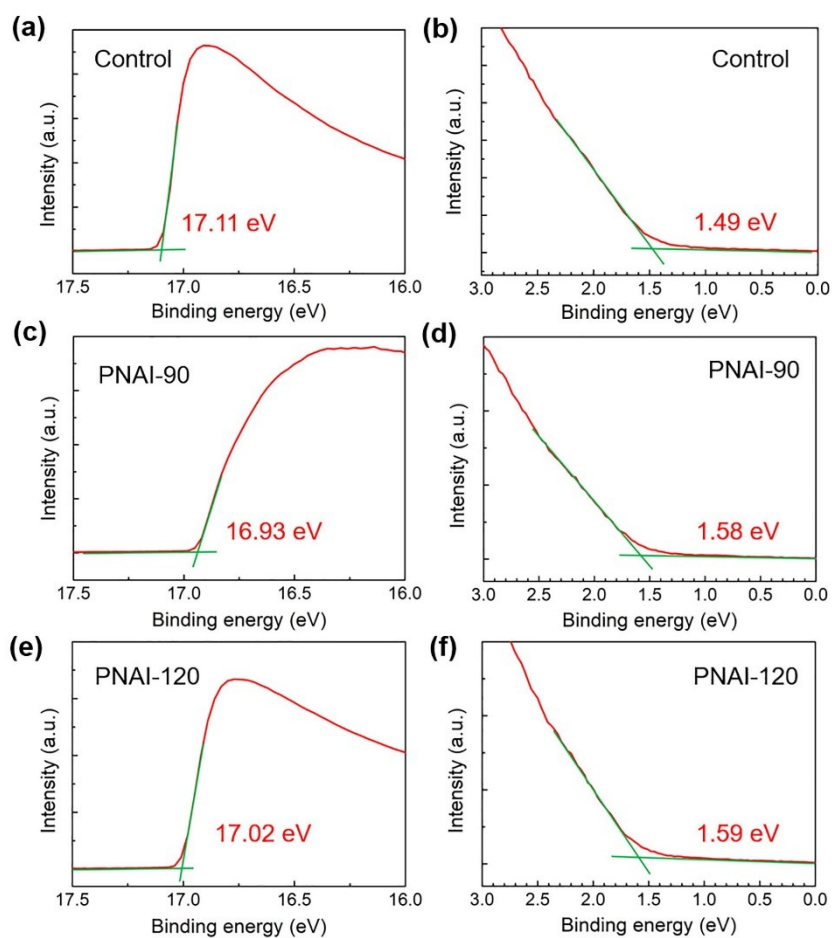

Figure S8 UPS analysis results for work function and valence band of Control, PNAI-90 treated and PNAI-120 treated perovskite film.

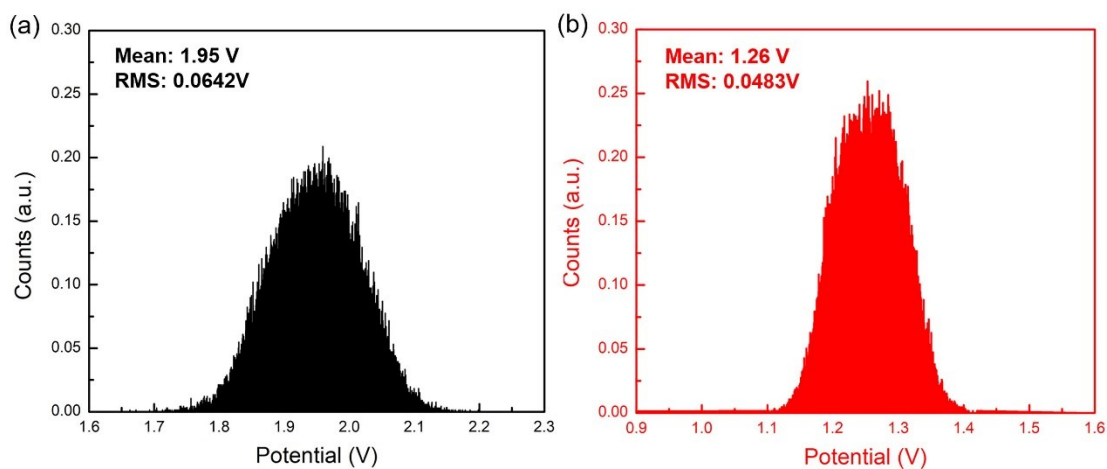

Figure S9 The surface potential distribution charts of (a) control perovskite and (b) PNAI-90 treated perovskite film.

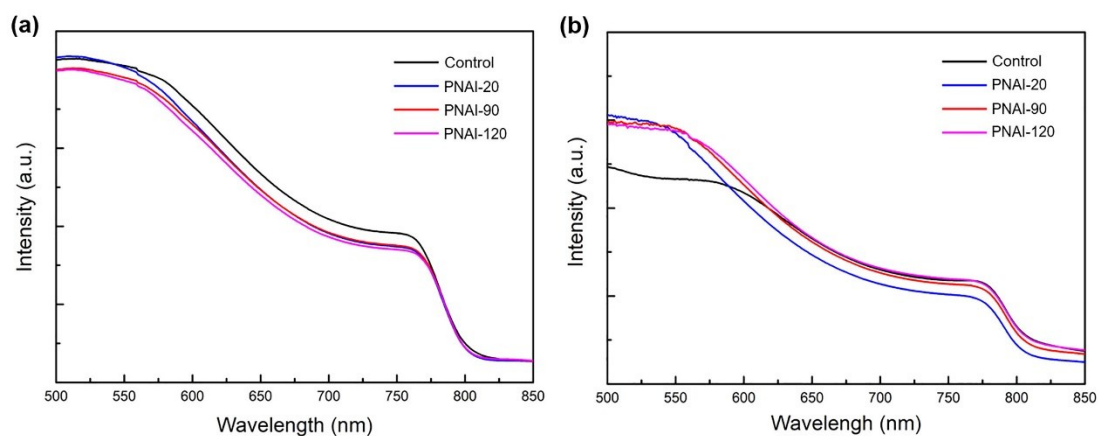

Figure S10 Absorption spectra of the perovskite film under different interfacial treatments before (a) and after (b) stored in high humidity ( $70\pm 10\%$  RH) for 150 days.

1. T. Niu, J. Lu, M.-C. Tang, D. Barrit, D.-M. Smilgies, Z. Yang, J. Li, Y. Fan, T. Luo and I. McCulloch, *Energy & Environmental Science*, 2018, **11**, 3358-3366.
2. W. Luo, C. Wu, D. Wang, Y. Zhang, Z. Zhang, X. Qi, N. Zhu, X. Guo, B. Qu and L. Xiao, *ACS applied materials & interfaces*, 2019, **11**, 9149-9155.
